# Supplementary material for: Ferromagnetic half-metallicity in YBaCo2O6 and spin-state driven metal–insulator transition
Source: Royal Society of Chemistry journal article supplement (doi:10.1039/d1tc02253a), 2021-01-01
Supplement: d1tc02253a1.pdf [file d1tc02253a1.pdf]

## Supplemental Information for Ferromagnetic half-metallicity in YBaCo<sub>2</sub>O<sub>6</sub> and spin-states driven metal-insulator transition

Wentao Hu,<sup>a</sup> Ke Yang,<sup>b,a</sup> Xuan Wen,<sup>a</sup> and Hua Wu<sup>a,c,\*</sup>

<sup>a</sup> *Laboratory for Computational Physical Sciences (MOE), State Key Laboratory of Surface Physics, and Department of Physics, Fudan University, Shanghai 200433, China*

<sup>b</sup> *College of Science, University of Shanghai for Science and Technology, Shanghai 200093, China*

<sup>c</sup> *Collaborative Innovation Center of Advanced Microstructures, Nanjing 210093, China*

Table S1 Relative total energies  $\Delta E$  (meV/f.u.) for different spin-states of YBaCo<sub>2</sub>O<sub>6</sub> calculated by LSDA+ $U$  with different  $U$  values. The total magnetic moment per formula unit ( $\mu_B$ /f.u.) is listed in the round brackets. Fixed-spin-moment (FSM) results in LSDA+ $U$  are also included.

|            | IS-Co <sup>3+</sup> /LS-Co <sup>4+</sup> | IS-Co <sup>3+</sup> /IS-Co <sup>4+</sup> | HS-Co <sup>3+</sup> /LS-Co <sup>4+</sup> | HS-Co <sup>3+</sup> /IS-Co <sup>4+</sup>        |
|------------|------------------------------------------|------------------------------------------|------------------------------------------|-------------------------------------------------|
| $U = 6$ eV | 0 (3.00 $\mu_B$ )                        | →HS/LS                                   | 114 (5.00 $\mu_B$ )                      | 596 (5.94 $\mu_B$ )<br>770 (FSM, 7.00 $\mu_B$ ) |
| $U = 5$ eV | 0 (3.00 $\mu_B$ )                        | →HS/LS                                   | 190 (4.91 $\mu_B$ )                      | →IS/LS<br>970 (FSM, 7.00 $\mu_B$ )              |
| $U = 4$ eV | 0 (3.00 $\mu_B$ )                        | →IS/LS                                   | →IS/LS<br>301 (FSM, 5.00 $\mu_B$ )       | →IS/LS<br>1138 (FSM, 7.00 $\mu_B$ )             |

Table S2 Relative energies  $\Delta E$  (meV/f.u.) of the IS-LS and HS-LS states of YBaCo<sub>2</sub>O<sub>6</sub> with different  $J_H$ .

| volume expansion | spin-states                              | $J_H = 1$ eV | $J_H = 0.8$ eV |
|------------------|------------------------------------------|--------------|----------------|
| +0%              | IS-Co <sup>3+</sup> /LS-Co <sup>4+</sup> | 0            | 0              |
|                  | HS-Co <sup>3+</sup> /LS-Co <sup>4+</sup> | 114          | 76             |
| +4%              | IS-Co <sup>3+</sup> /LS-Co <sup>4+</sup> | 47           | 85             |
|                  | HS-Co <sup>3+</sup> /LS-Co <sup>4+</sup> | 0            | 0              |

Table S3 Relative energies  $\Delta E$  (meV/f.u.), local spin and orbital moments ( $\mu_B$ /Co) of the IS-LS and HS-LS states of YBaCo<sub>2</sub>O<sub>6</sub> calculated by LSDA+ $U$  and LSDA+ $U$ +SOC.

| volume expansion | spin-states                              | LSDA+ $U$  |            | LSDA+ $U$ +SOC |            |           |
|------------------|------------------------------------------|------------|------------|----------------|------------|-----------|
|                  |                                          | $\Delta E$ | $M_{spin}$ | $\Delta E$     | $M_{spin}$ | $M_{orb}$ |
| +0%              | IS-Co <sup>3+</sup> /LS-Co <sup>4+</sup> | 0          | 1.69/1.69  | 0              | 1.67/1.67  | 0.29/0.30 |
|                  | HS-Co <sup>3+</sup> /LS-Co <sup>4+</sup> | 114        | 2.80/1.70  | 114            | 2.72/1.67  | 0.16/0.36 |
| +4%              | IS-Co <sup>3+</sup> /LS-Co <sup>4+</sup> | 47         | 1.78/1.78  | 48             | 1.75/1.75  | 0.33/0.33 |
|                  | HS-Co <sup>3+</sup> /LS-Co <sup>4+</sup> | 0          | 2.90/1.51  | 0              | 2.86/1.49  | 0.18/0.28 |

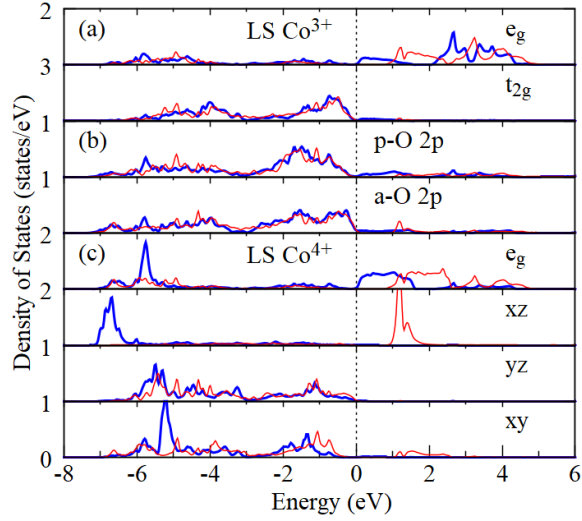

Fig. S1 DOS of  $\text{YBaCo}_2\text{O}_6$  in the LS- $\text{Co}^{3+}$ /LS- $\text{Co}^{4+}$  state by LSDA+ $U$ . It is a paramagnetic insulator.

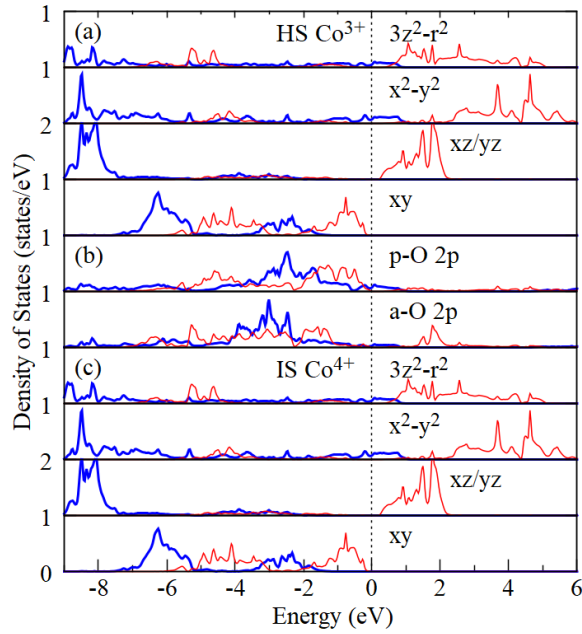

Fig. S2 DOS of  $\text{YBaCo}_2\text{O}_6$  in the HS- $\text{Co}^{3+}$ /IS- $\text{Co}^{4+}$  state by LSDA+ $U$  FSM calculation with  $M_{\text{tot}} = 7.00 \mu_B/\text{f.u.}$ . It is a FM half-metal.
